# Supplementary material
Source: PubMed Central journal article supplement (PMC3883510)
Supplement: NIHMS320311-supplement-supplement_1.pdf [file NIHMS320311-supplement-supplement_1.pdf]

**Supplementary Table 1.** Proband-sibling analysis of interactions between CYP1A2 -154A>C and red meat doneness level variables

|                                                                                                                    | Colorectal cancer  |           |                 |           |         | Colon cancer       |           |                 |           |         | Rectal cancer      |           |                 |           |         | Heterog.<br>p-value <sup>d</sup> |
|--------------------------------------------------------------------------------------------------------------------|--------------------|-----------|-----------------|-----------|---------|--------------------|-----------|-----------------|-----------|---------|--------------------|-----------|-----------------|-----------|---------|----------------------------------|
|                                                                                                                    | Pb/Sb <sup>a</sup> |           | OR <sup>b</sup> | 95% CI    | p-value | Pb/Sb <sup>a</sup> |           | OR <sup>b</sup> | 95% CI    | p-value | Pb/Sb <sup>a</sup> |           | OR <sup>b</sup> | 95% CI    | p-value |                                  |
|                                                                                                                    | <i>RM</i>          | <i>WD</i> |                 |           |         | <i>RM</i>          | <i>WD</i> |                 |           |         | <i>RM</i>          | <i>WD</i> |                 |           |         |                                  |
| <b>Level of doneness of meat in the inside (rare-medium = <i>RM</i> or well-done = <i>WD</i>)</b>                  |                    |           |                 |           |         |                    |           |                 |           |         |                    |           |                 |           |         |                                  |
| A/A                                                                                                                | 95/103             | 70/81     | 0.89            | 0.55-1.43 | 0.632   | 55/64              | 45/48     | 1.14            | 0.61-2.13 | 0.682   | 33/29              | 16/23     | 0.56            | 0.23-1.33 | 0.187   |                                  |
| A/C                                                                                                                | 49/75              | 68/69     | 1.58            | 0.95-2.63 | 0.076   | 30/41              | 39/40     | 1.36            | 0.71-2.61 | 0.347   | 12/21              | 17/17     | 1.72            | 0.59-5.00 | 0.322   |                                  |
| C/C                                                                                                                | 9/11               | 15/17     | 1.05            | 0.35-3.10 | 0.933   | 6/7                | 9/11      | 1.04            | 0.26-4.13 | 0.958   | 3/3                | 3/4       | 0.61            | 0.08-4.91 | 0.640   |                                  |
| per A allele                                                                                                       |                    |           | 0.96            | 0.61-1.52 | 0.855   |                    |           | 1.18            | 0.65-2.17 | 0.586   |                    |           | 0.61            | 0.26-1.42 | 0.251   |                                  |
| per C allele                                                                                                       |                    |           | 1.29            | 0.87-1.91 | 0.202   |                    |           | 1.23            | 0.74-2.06 | 0.428   |                    |           | 1.02            | 0.49-2.12 | 0.957   |                                  |
| <i>Interaction OR</i>                                                                                              |                    |           | 1.35            | 0.82-2.20 | 0.237   |                    |           | 1.04            | 0.54-1.99 | 0.905   |                    |           | 1.70            | 0.70-4.01 | 0.244   | 0.574                            |
| <b>Level of doneness of red meat from outside (light-medium brown = <i>LMB</i> or heavily browned = <i>HB</i>)</b> |                    |           |                 |           |         |                    |           |                 |           |         |                    |           |                 |           |         |                                  |
|                                                                                                                    | Pb/Sb <sup>a</sup> |           | OR <sup>c</sup> | 95% CI    | p-value | Pb/Sb <sup>a</sup> |           | OR <sup>c</sup> | 95% CI    | p-value | Pb/Sb <sup>a</sup> |           | OR <sup>c</sup> | 95% CI    | p-value | Heterog.<br>p-value <sup>d</sup> |
|                                                                                                                    | <i>LMB</i>         | <i>HB</i> |                 |           |         | <i>LMB</i>         | <i>HB</i> |                 |           |         | <i>LMB</i>         | <i>HB</i> |                 |           |         |                                  |
| A/A                                                                                                                | 115/140            | 50/44     | 1.35            | 0.79-2.31 | 0.270   | 65/83              | 35/29     | 1.65            | 0.83-3.29 | 0.153   | 40/43              | 9/9       | 0.91            | 0.33-2.49 | 0.853   |                                  |
| A/C                                                                                                                | 84/93              | 33/51     | 0.75            | 0.42-1.32 | 0.316   | 49/48              | 20/33     | 0.57            | 0.26-1.24 | 0.155   | 22/31              | 7/7       | 1.69            | 0.48-5.93 | 0.415   |                                  |
| C/C                                                                                                                | 14/20              | 10/7      | 2.24            | 0.71-7.10 | 0.170   | 10/13              | 5/4       | 1.69            | 0.39-7.23 | 0.481   | 2/6                | 4/1       | -               | -         | -       |                                  |
| per A allele                                                                                                       |                    |           | 1.14            | 0.68-1.89 | 0.621   |                    |           | 1.37            | 0.71-2.63 | 0.341   |                    |           | 0.78            | 0.29-2.07 | 0.614   |                                  |
| per C allele                                                                                                       |                    |           | 1.09            | 0.72-1.66 | 0.672   |                    |           | 0.95            | 0.55-1.64 | 0.866   |                    |           | 2.45            | 0.84-7.13 | 0.100   |                                  |
| <i>Interaction OR</i>                                                                                              |                    |           | 0.96            | 0.56-1.66 | 0.893   |                    |           | 0.70            | 0.35-1.39 | 0.305   |                    |           | 3.16            | 0.85-11.7 | 0.086   | 0.154                            |

<sup>a</sup>Pb= probands; Sb= siblings; <sup>b</sup>OR for well-done red meat within each genotype subgroup with rare-medium as referent group; <sup>c</sup>OR for heavily browned red meat within each genotype subgroup with light-medium brown as referent group; <sup>d</sup>colon versus rectum heterogeneity test.

**Supplementary Table 2.** Proband-sibling analysis of interactions between GSTP1 Ile105Val and number of servings of cooked poultry per week

|                       | Colorectal cancer  |       |                 |                  |              | Colon cancer       |       |                 |                  |              | Rectal cancer      |       |                 |                  |              | Heterog.<br>p-value <sup>c</sup> |
|-----------------------|--------------------|-------|-----------------|------------------|--------------|--------------------|-------|-----------------|------------------|--------------|--------------------|-------|-----------------|------------------|--------------|----------------------------------|
|                       | Pb/Sb <sup>a</sup> |       | OR <sup>b</sup> | 95% CI           | p-value      | Pb/Sb <sup>a</sup> |       | OR <sup>b</sup> | 95% CI           | p-value      | Pb/Sb <sup>a</sup> |       | OR <sup>b</sup> | 95% CI           | p-value      |                                  |
|                       | ≤ 3                | > 3   |                 |                  |              | ≤ 3                | > 3   |                 |                  |              | ≤ 3                | > 3   |                 |                  |              |                                  |
| A/A                   | 85/123             | 42/48 | 1.32            | 0.76-2.27        | 0.324        | 57/81              | 21/25 | 1.29            | 0.61-2.70        | 0.510        | 15/31              | 18/16 | 2.68            | 0.97-7.44        | 0.058        |                                  |
| A/C                   | 104/100            | 33/43 | 0.76            | 0.42-1.37        | 0.361        | 64/60              | 23/25 | 0.89            | 0.43-1.81        | 0.741        | 29/24              | 8/11  | 0.70            | 0.19-2.52        | 0.581        |                                  |
| C/C                   | 33/31              | 5/12  | 0.30            | 0.08-1.17        | 0.084        | 13/15              | 3/7   | 0.25            | 0.03-2.36        | 0.227        | 13/12              | 1/3   | 0.24            | 0.02-3.4         | 0.293        |                                  |
| per A allele          |                    |       | 1.30            | 0.78-2.18        | 0.320        |                    |       | 1.31            | 0.65-2.62        | 0.457        |                    |       | 2.10            | 0.86-5.14        | 0.105        |                                  |
| per C allele          |                    |       | 0.73            | 0.47-1.13        | 0.161        |                    |       | 0.84            | 0.48-1.48        | 0.546        |                    |       | 0.75            | 0.31-1.85        | 0.533        |                                  |
| <i>Interaction OR</i> |                    |       | <i>0.56</i>     | <i>0.31-1.01</i> | <i>0.054</i> |                    |       | <i>0.64</i>     | <i>0.29-1.43</i> | <i>0.280</i> |                    |       | <i>0.36</i>     | <i>0.11-1.14</i> | <i>0.082</i> | <i>0.709</i>                     |

<sup>a</sup>Pb= proband, Sb= sibling; <sup>b</sup>OR for > 3 servings of red meat per week within each genotype subgroup with ≤ 3 servings per week as referent group; <sup>c</sup>colon versus rectum heterogeneity test.
